# Supplementary material for: Solubility determination, dissolution properties and solid transformation of resmetirom (form A) in heptane and seven alcohols
Source: Royal Society of Chemistry journal article supplement (doi:10.1039/d3ra02521g), 2023-01-01
Supplement: d3ra02521g1.pdf [file d3ra02521g1.pdf]

## **Solubility determination, dissolution properties and solid transformation of resmetirom (form A) in heptane and seven alcohols**

Chang Liu <sup>a1</sup>, Yue Xu <sup>a1</sup>, Haikuan Yuan <sup>a\*</sup>, Guangxin Tian <sup>a</sup>, Xiaolan Qin <sup>a</sup>, Boxuan Lou <sup>a</sup>, Xijian Liu <sup>a</sup>, Lijuan Zhang <sup>a</sup>, Jie Lu <sup>a\*</sup>

<sup>a</sup>College of Chemistry and Chemical Engineering, Shanghai University of Engineering Science, Shanghai 201620, China. [lujie@sues.edu.cn](mailto:lujie@sues.edu.cn)

**Table S1** Parameters and *ARD%* of the modified Apelblat equation for the solubility of form A in six solvents.

| Solvent            | Apelblat |          |          | <i>ARD%</i> |
|--------------------|----------|----------|----------|-------------|
|                    | <i>A</i> | <i>B</i> | <i>C</i> |             |
| Propanol           | 9.666    | -3107.3  | 0.040    | 0.146       |
| Isopropyl alcohol  | 8.456    | -2803.4  | 0.056    | 0.194       |
| Butanol            | 7.510    | -2555.1  | 0.026    | 0.116       |
| Isobutyl alcohol   | 8.261    | -2328.7  | -0.279   | 0.222       |
| 3-Methyl-1-butanol | 8.026    | -2250.7  | -0.324   | 0.123       |
| Heptane            | 5.067    | -2089.5  | -0.001   | 0.312       |

**Table S2** Parameters and *ARD%* of the  $\lambda h$  equation and the Wilson model for the solubility of form A in six solvents.

| Solvent            | $\lambda h$   |         |             | Wilson                |                       |             |
|--------------------|---------------|---------|-------------|-----------------------|-----------------------|-------------|
|                    | $10^2\lambda$ | $10^5h$ | <i>ARD%</i> | $10^{-4}\lambda_{12}$ | $10^{-4}\lambda_{21}$ | <i>ARD%</i> |
| Propanol           | 10.403        | 2.974   | 0.223       | 2.492                 | 16.231                | 0.313       |
| Isopropyl alcohol  | 5.567         | 4.996   | 0.157       | 2.512                 | 16.038                | 0.906       |
| Butanol            | 2.637         | 9.518   | 0.241       | 7.64                  | 0.688                 | 1.699       |
| Isobutyl alcohol   | 1.163         | 18.619  | 0.305       | 7.759                 | 0.689                 | 2.161       |
| 3-Methyl-1-butanol | 0.775         | 26.629  | 0.353       | 7.377                 | 0.732                 | 2.815       |
| Heptane            | 0.386         | 51.666  | 0.336       | 7.895                 | 0.805                 | 5.535       |

**Table S3** Parameters and *ARD%* of the modified Apelblat equation and  $\lambda h$  equation for the solubility of form A in propanol + heptane.

| $\omega$ | Apelblat |         |        | ARD%  | $\lambda h$   |            | ARD%  |
|----------|----------|---------|--------|-------|---------------|------------|-------|
|          | A        | B       | C      |       | $10^2\lambda$ | $10^{-5}h$ |       |
| 0.2      | 3.361    | -2174.4 | 0.398  | 0.558 | 0.762         | 2.917      | 0.527 |
| 0.4      | 8.082    | -2548.5 | -0.160 | 0.527 | 1.476         | 1.655      | 1.000 |
| 0.6      | 7.345    | -2678.3 | 0.096  | 0.412 | 2.854         | 0.933      | 0.414 |
| 0.8      | 8.522    | -2892.3 | 0.065  | 0.491 | 5.453         | 0.528      | 0.326 |

---

**Table S4** Parameters and *ARD%* of the J-A-V model for the solubility of resmetirom (form A) in mixed solvents.

---

| Propanol + Heptane |        |
|--------------------|--------|
| $A_1$              | 3.028  |
| $A_2$              | -1.850 |
| $B_1$              | -3119  |
| $B_2$              | -2089  |
| $J_0$              | 4.342  |
| $J_1$              | 0.160  |
| $J_2$              | -0.164 |
| <i>ARD%</i>        | 0.465  |
